# Supplementary material for: Atom efficient synthesis of pyrimidine and purine nucleosides by ball milling
Source: Royal Society of Chemistry journal article supplement (doi:10.1039/c5ra12239b), 2015-01-01

## Atom efficient synthesis of pyrimidine and purine nucleosides by ball milling

K. Crossey, R. N. Cunningham, P. Redpath and M. E. Migaud

### Supporting Information

#### Crude NMR spectra of nucleosides synthesised *via* mechanical milling

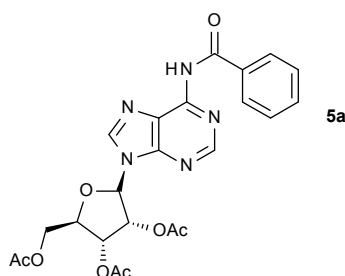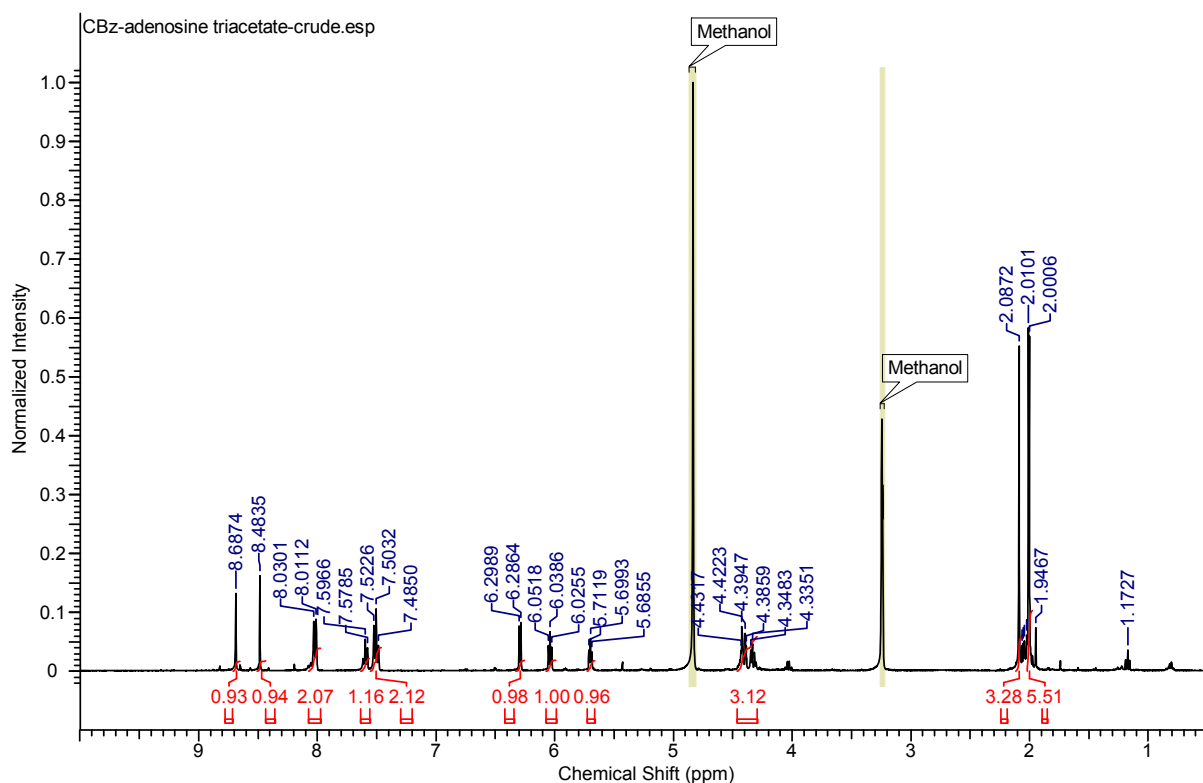

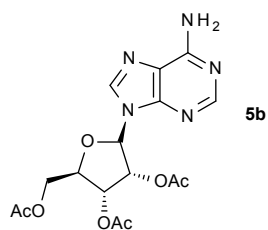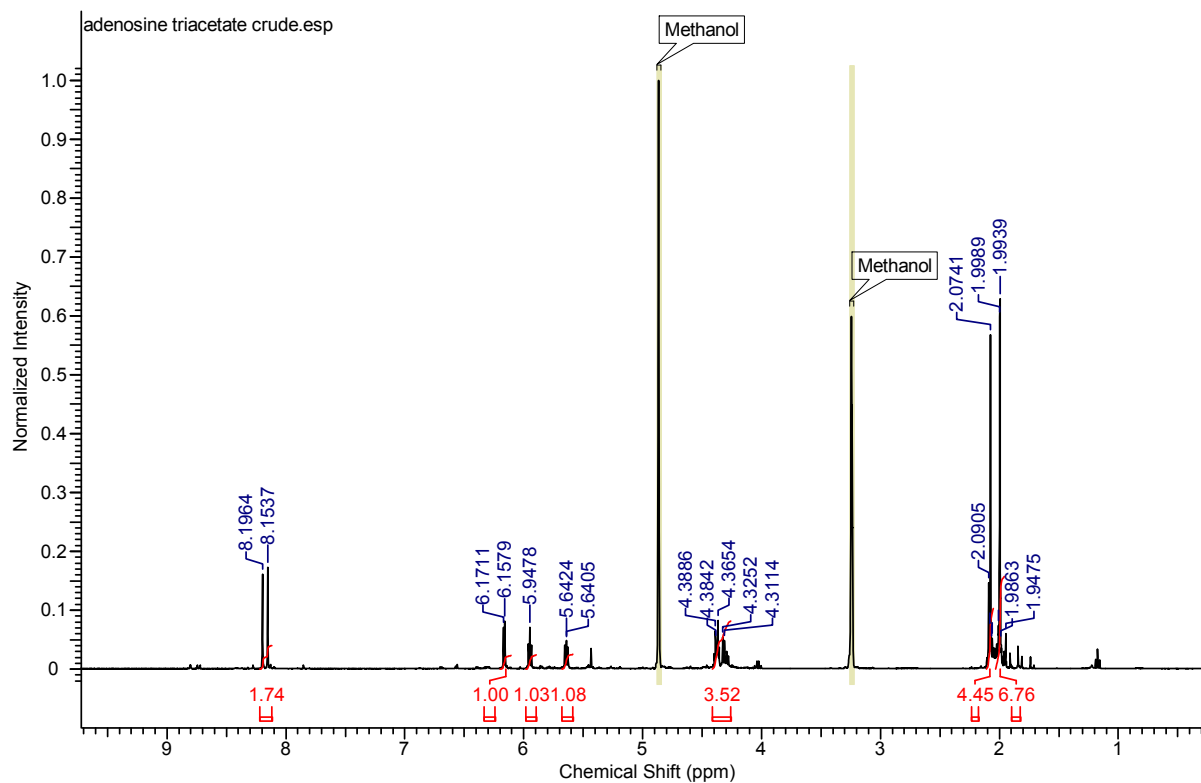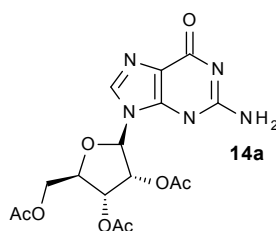

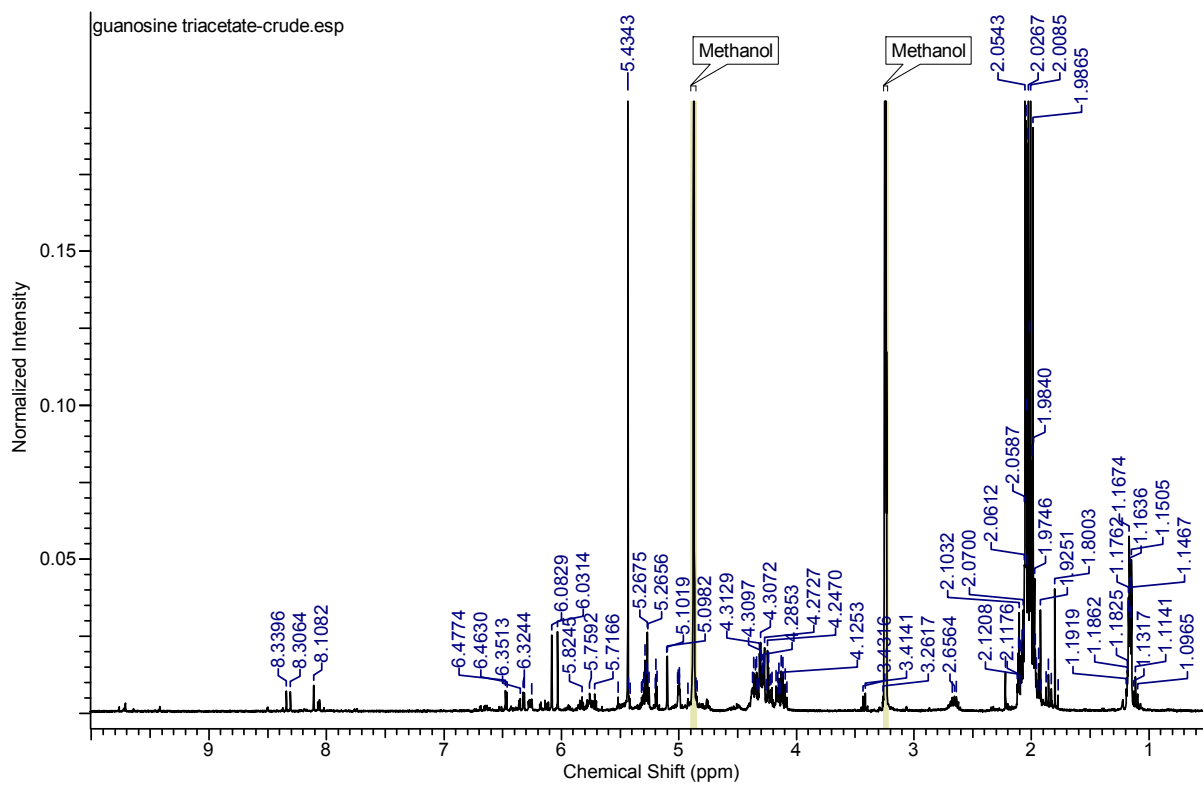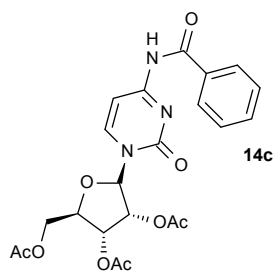

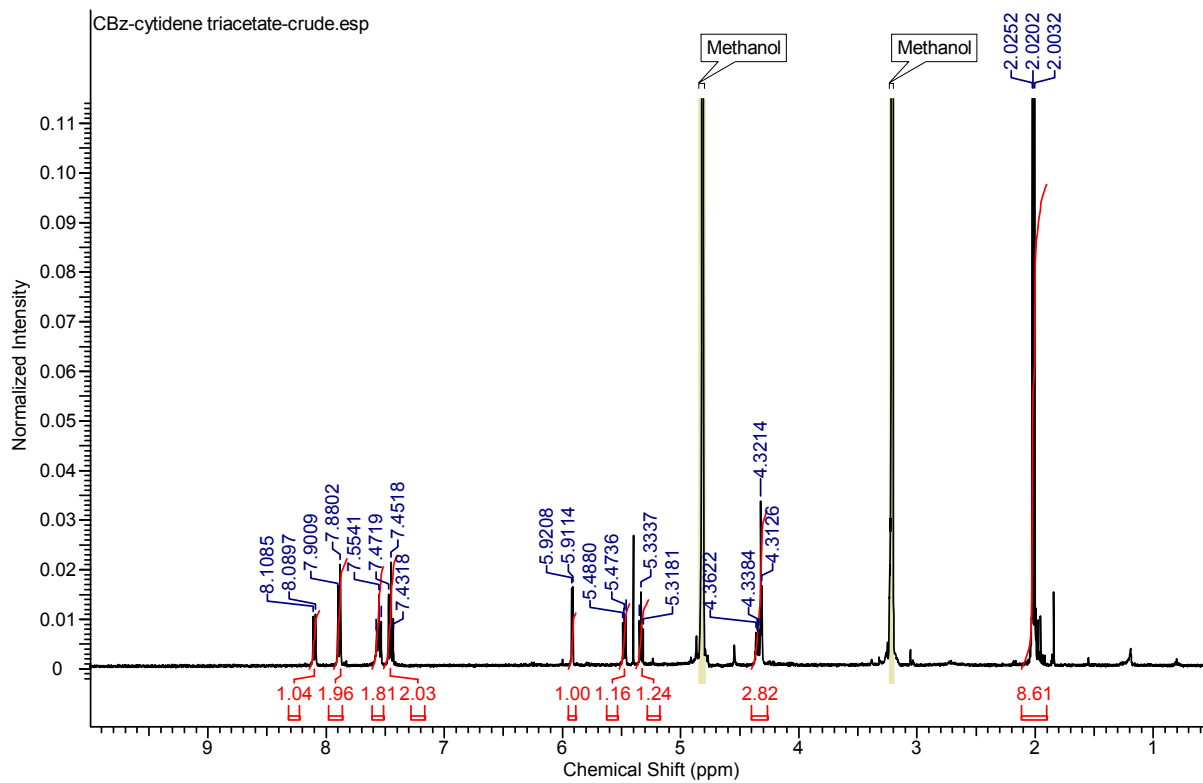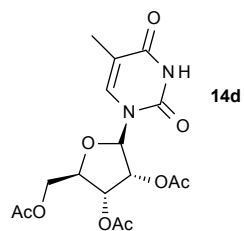

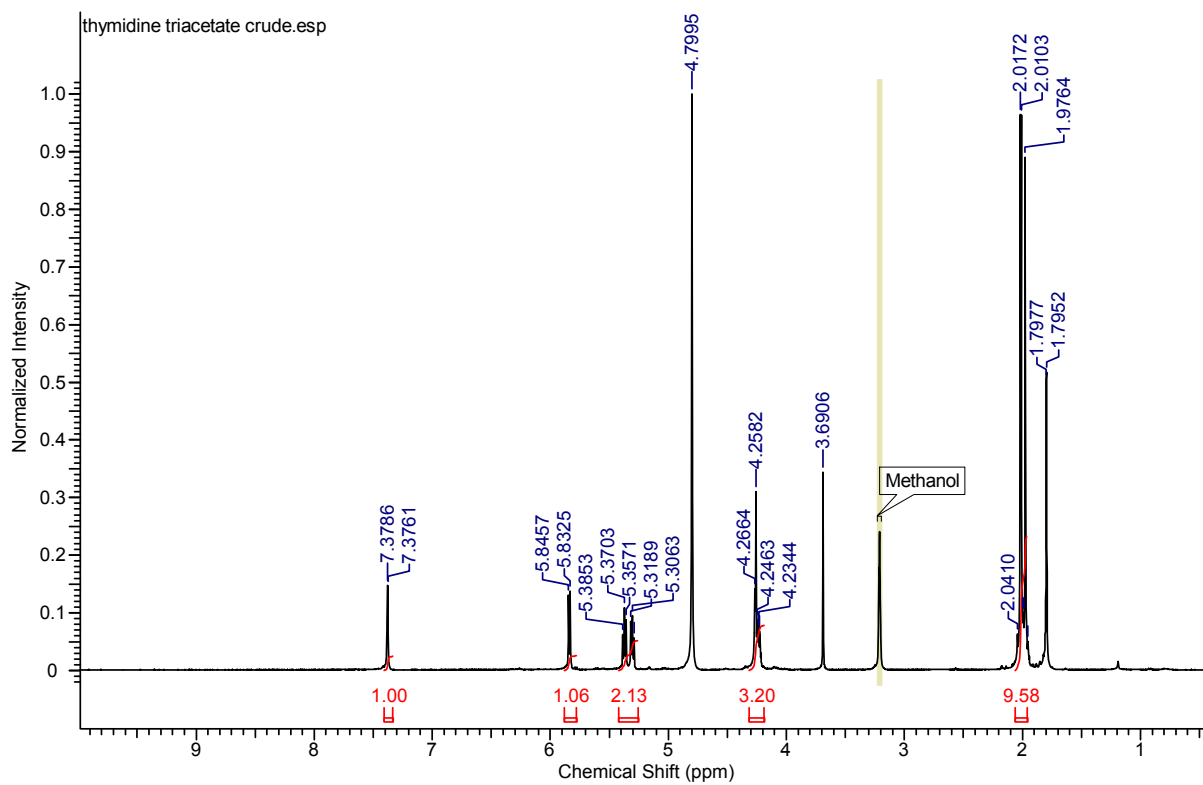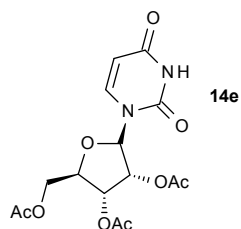

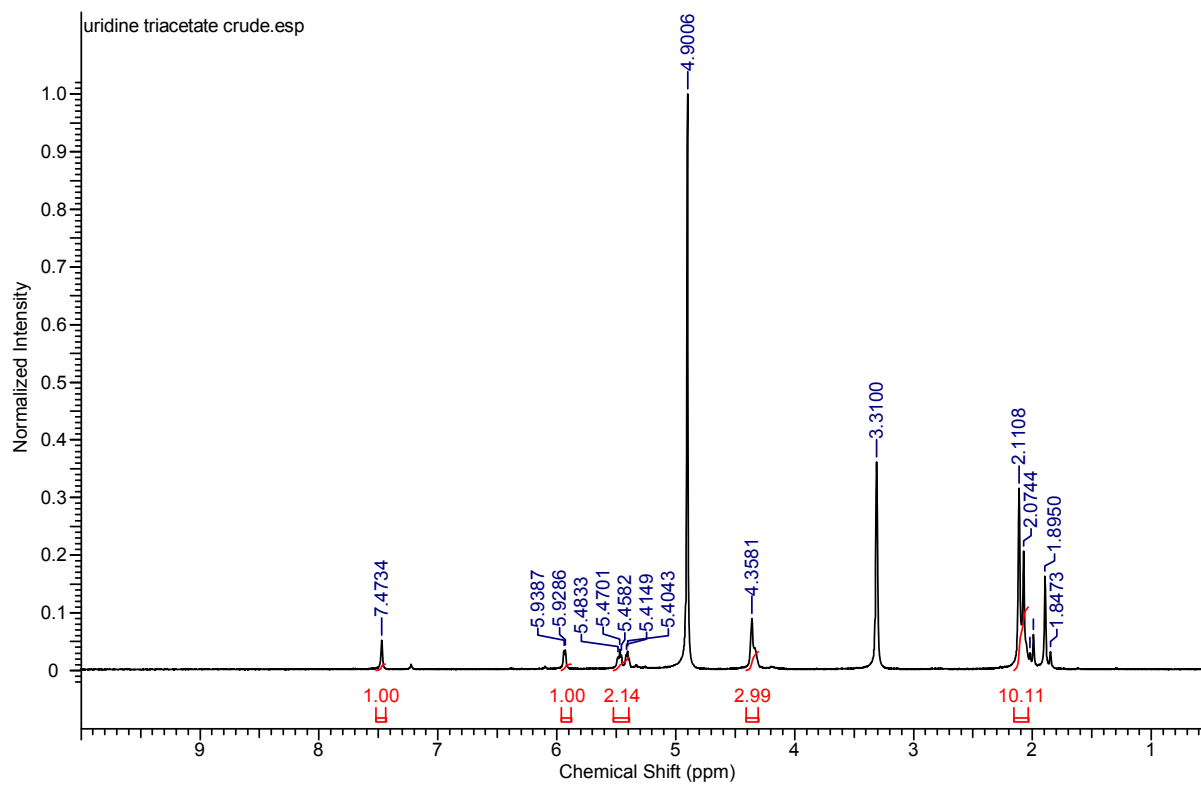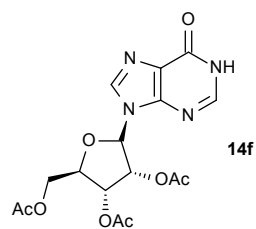

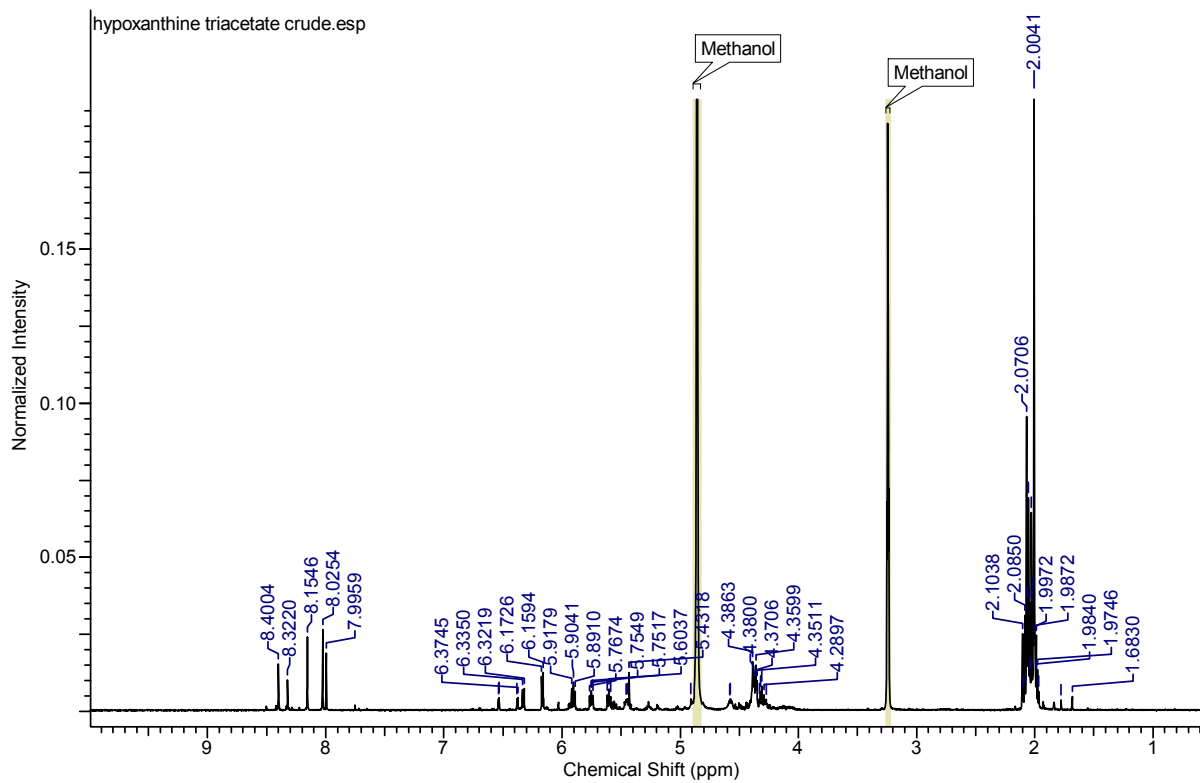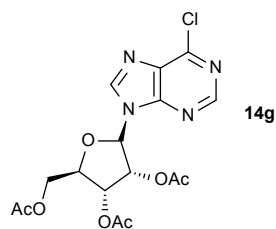

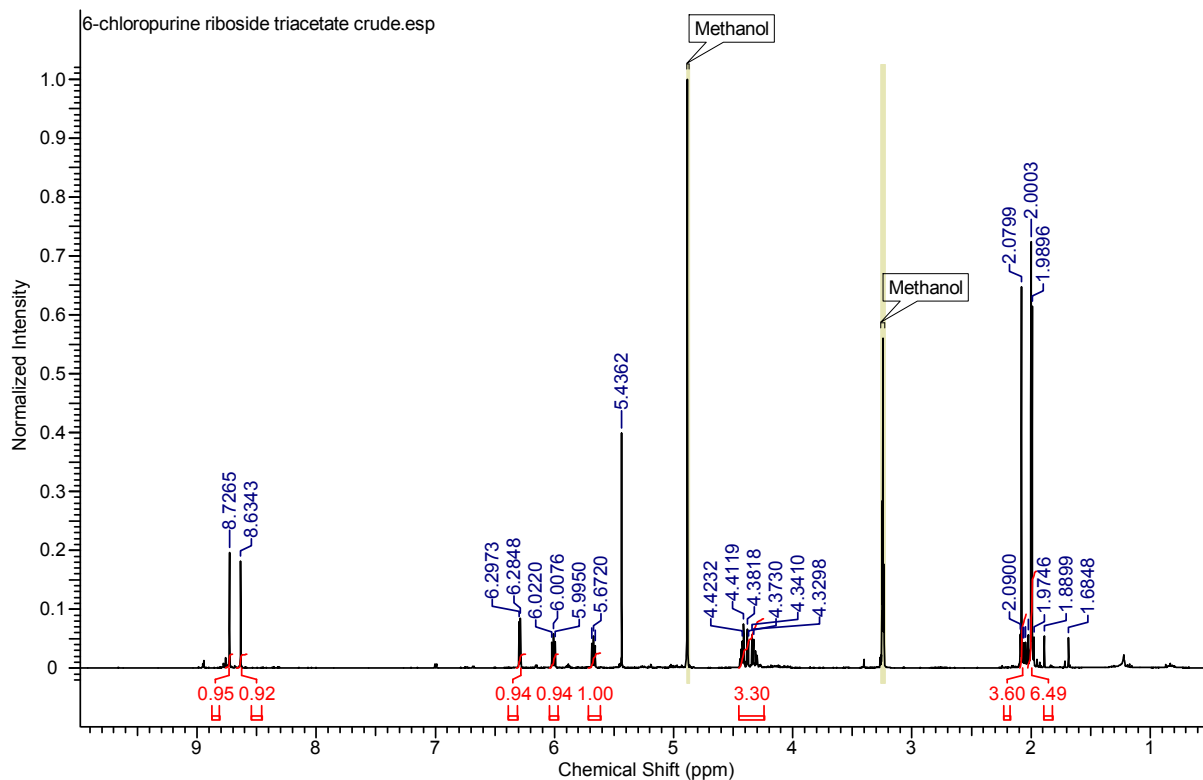<sup>1</sup>H NMR of **14g** without prior silylation of the 6-chloropurine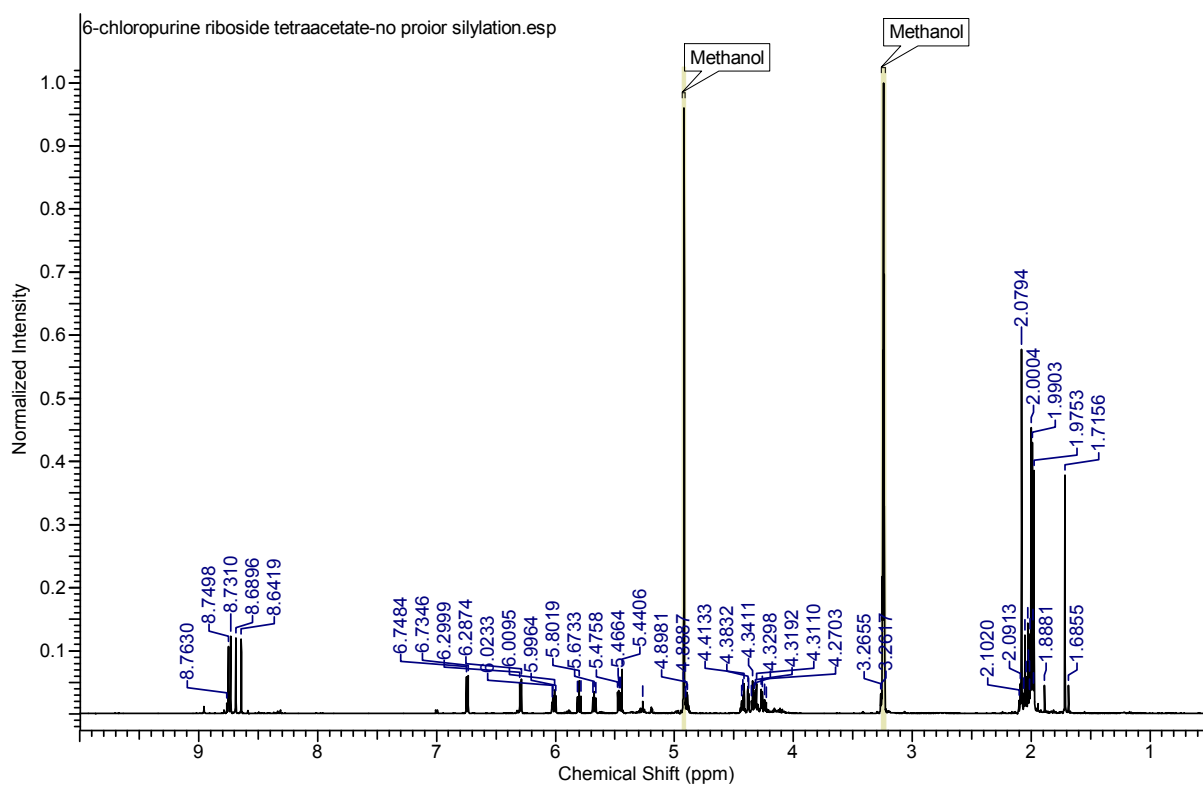<sup>1</sup>H NMR of after *in situ* deprotection of **5b** with K<sub>2</sub>CO<sub>3</sub> in MeOH to give fully deacetylated adenosine



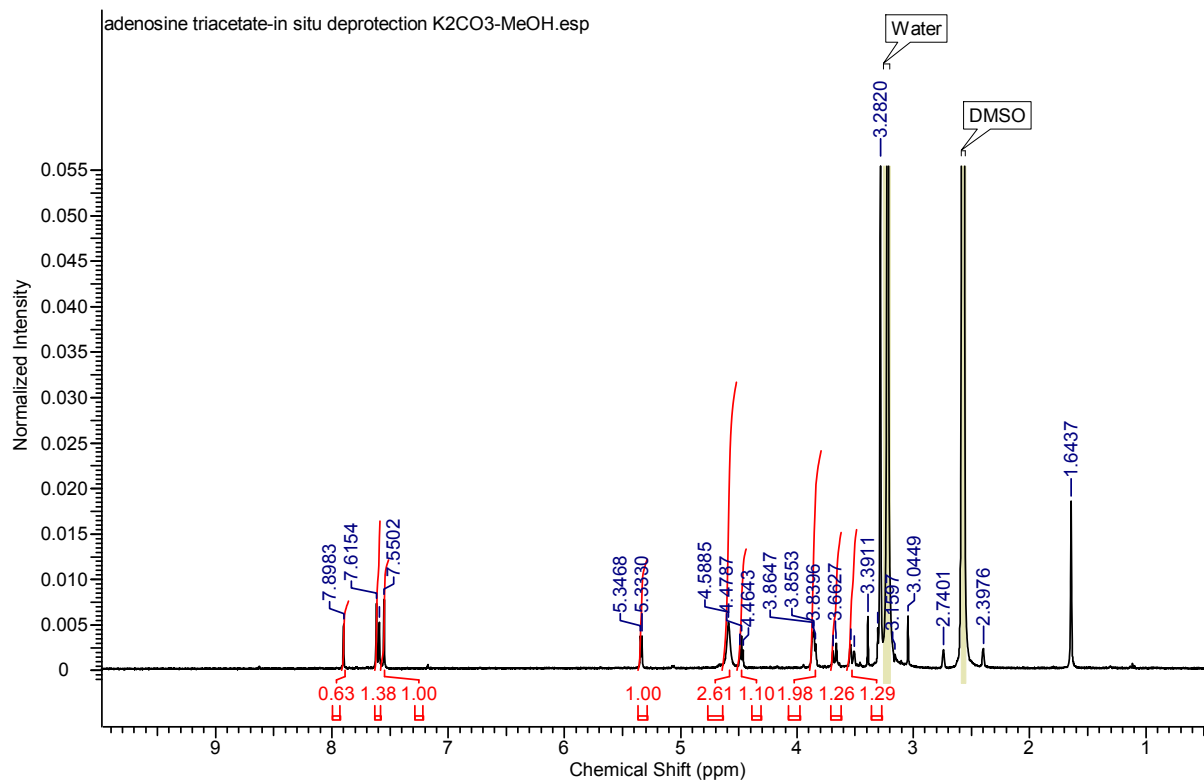

Supplement: c5ra12239b1.pdf [file c5ra12239b1.pdf]
